# Supplementary material
Source: bioRxiv or medRxiv preprint supplement (https://www.biorxiv.org/highwire/filestream/2256/field_highwire_adjunct_files/7/008862-16.pdf)
Supplement: Supplementary file [file 008862-16.pdf]

DM probes, chimpanzee-human iPSCs,  
reduced model (n = 64,047)

DM probes, chimpanzee-human iPSCs,  
full model (n = 31,011)

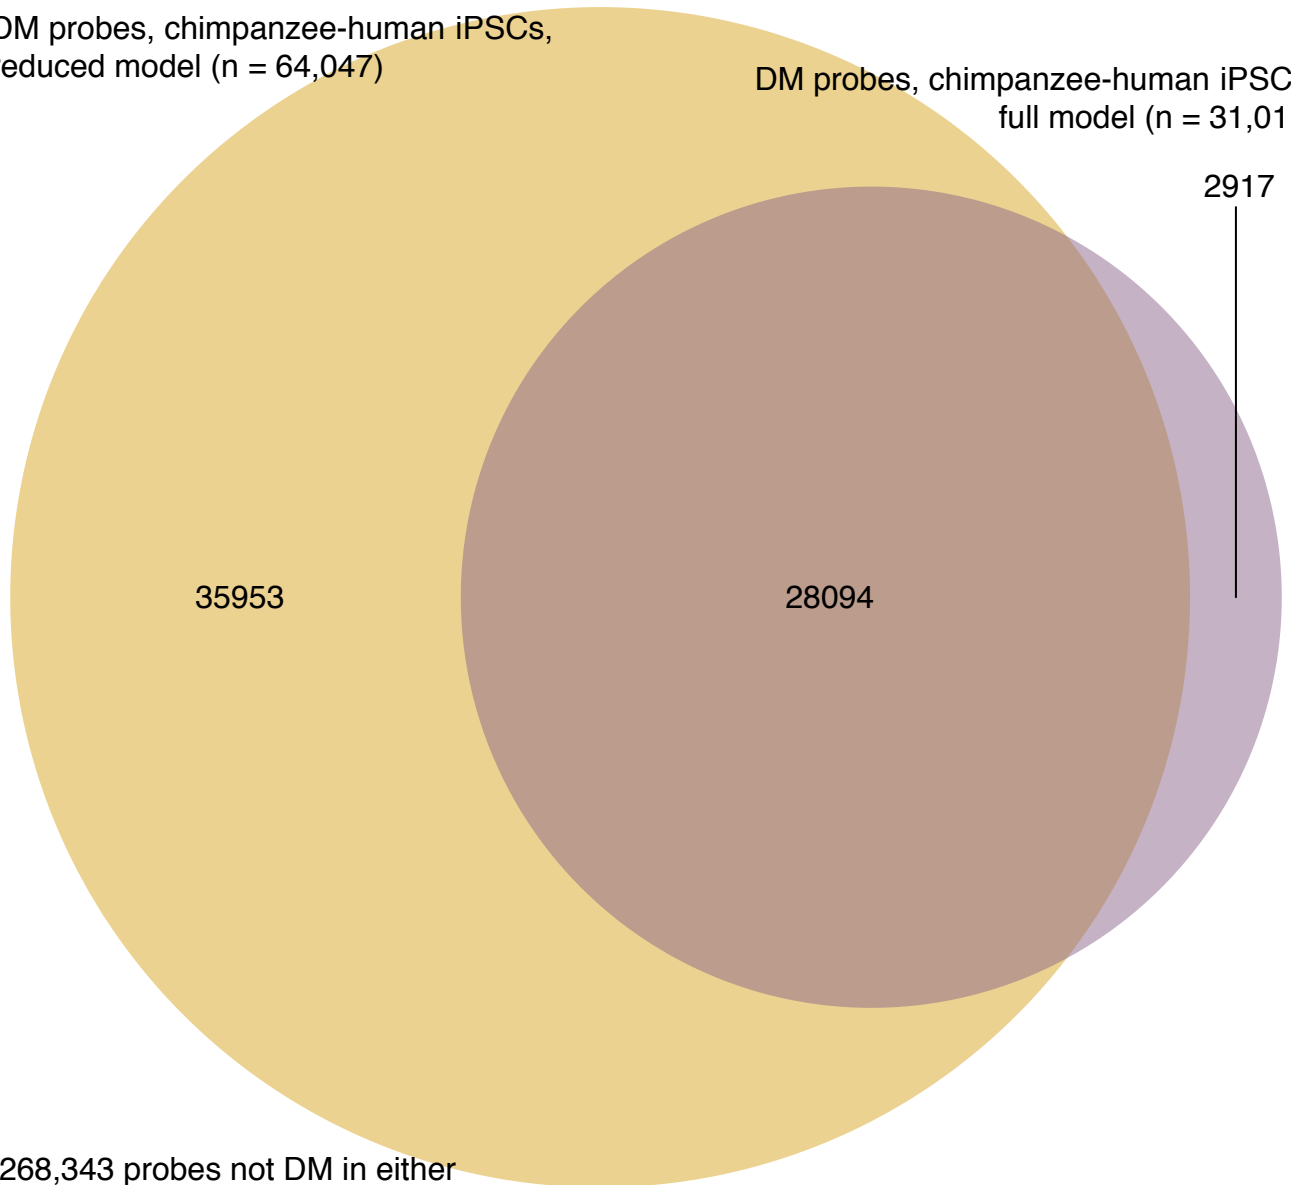

2917

35953

28094

268,343 probes not DM in either
